# Supplementary material for: Preparation of an OTA aptasensor based on a metal–organic framework
Source: Royal Society of Chemistry journal article supplement (doi:10.1039/c8ay00758f), 2018-01-01
Supplement: c8ay00758f1.pdf [file c8ay00758f1.pdf]

## **The preparation of OTA aptasensor based on metal-organic frameworks**

De-lei Li, Xi Zhang, Yuchan Ma, Yan Deng, Rong Hu\*, Yunhui Yang\*

College of Chemistry and Chemical Engineering, Yunnan Normal University, Yunnan, Kunming

650500, P.R. China

\*To whom correspondence should be addressed.

E-mail: hudierong\_168@163.com, yyhui2002@aliyun.com

Phone: 86-871-65941087

**Table S1** The comparison of the response features of the aptasensors using different substrate.

| substrates                | Linear range<br>(ng.mL <sup>-1</sup> ) | Detection limit (ng.mL <sup>-1</sup> ) | Slope<br>(sensitivity) |
|---------------------------|----------------------------------------|----------------------------------------|------------------------|
| Au NPs                    | 0.1-100                                | 0.033                                  | -21.997                |
| Au NPs / MoS <sub>2</sub> | 0.05-100                               | 0.01                                   | -24.738                |

**Table S2** The Comparison of linear ranges and detection limits of various aptasensors related to OTA.

| No | Method                        | Linear range<br>(ng.mL <sup>-1</sup> ) | Detection<br>limit<br>(ng.mL <sup>-1</sup> ) | Reference                       |
|----|-------------------------------|----------------------------------------|----------------------------------------------|---------------------------------|
| 1  | HPLC                          |                                        | 0.06                                         | Xie et al. 2018 <sup>26</sup>   |
| 2  | fluorescent biosensor         | 1-100                                  | 0.8                                          | Chen et al. 2012 <sup>27</sup>  |
| 3  | Electrochemical<br>aptasensor | 1009.5-4030.8                          | 1009.9                                       | Yang et al. 2012 <sup>28</sup>  |
| 4  | fluorescent biosensor         | 807.6-14133.4                          | 767.2                                        | Sheng et al. 2011 <sup>13</sup> |
| 5  | Electrochemical<br>aptasensor | 0.1-20                                 | 0.03                                         | Kuang et al. 2010 <sup>29</sup> |
| 6  | fluorescent biosensor         | 0-1                                    | 0.013                                        | Guo et al. 2018 <sup>30</sup>   |
| 7  | Electrochemical<br>aptasensor | 0.05-100                               | 0.01                                         | This work                       |

13. L. Sheng, J. Ren, Y. Miao, J. Wang and E. Wang, *Biosensors and Bioelectronics*, 2011, **26**, 3494-3499.

26 X. Yu, H. Song, J. Huang, Y. Chen, M. Dai, Xucong Lin and Z. Xie, *J. Mater. Chem. B*, 2018, **10**, DOI: 1039/C7TB03319B.

27. J. Chen, Z. Fang, J. Liu and L. Zeng, *Food Control*, 2012, **25**, 555-560.

28. C. Yang, V. Lates, B. Prieto-Simón, J. Marty and X. Yang, *Biosensors and Bioelectronics*, 2012, **32**, 208-212.

29. H. Kuang, W. Chen, D. Xu, L. Xu, Y. Zhu, L. Liu, H. Chu, C. Peng, C. Xu and S. Zhu, *Biosensors and Bioelectronics*, 2010, **26**, 710-716.

30. S. Wang, Y. Zhang, G. Pang, Y. Zhang and S. Guo, *Anal. Chem.*, 2017, **89**, 1704-1709.

**Table S3** Application of aptasensor for OTA determination in wine samples

| Sample | Added<br>(ng.mL <sup>-1</sup> ) | Found<br>(ng.mL <sup>-1</sup> )<br>n=3 | Average<br>Found<br>(ng.mL <sup>-1</sup> ) | Recovery<br>(%) | Average<br>Recovery<br>(%) |
|--------|---------------------------------|----------------------------------------|--------------------------------------------|-----------------|----------------------------|
|        |                                 | 0.085                                  |                                            |                 |                            |
| 1      | 0.0                             | 0.091                                  | 0.086                                      | -               | -                          |
|        |                                 | 0.082                                  |                                            |                 |                            |
|        |                                 | 0.181                                  |                                            | 94.7            |                            |
| 2      | 0.10                            | 0.186                                  | 0.183                                      | 99.7            |                            |
|        |                                 | 0.183                                  |                                            | 96.7            |                            |
|        |                                 | 0.991                                  |                                            | 90.5            |                            |
| 3      | 1.0                             | 1.114                                  | 1.062                                      | 102.8           | 97.3                       |
|        |                                 | 1.080                                  |                                            | 99.4            |                            |
|        |                                 | 24.01                                  |                                            | 95.7            |                            |
| 4      | 25.0                            | 22.85                                  | 24.41                                      | 91.1            |                            |
|        |                                 | 26.38                                  |                                            | 105.2           |                            |
